# Supplementary material for: Evaluation of Genome-Enabled Prediction for Carcass Primal Cut Yields Using Single-Step Genomic Best Linear Unbiased Prediction in Hanwoo Cattle
Source: MDPI journal article supplement (doi:10.3390/genes12121886), 2021-11-25
Supplement: s1 [file s1]

## Supplementary Material

### Supplementary Figures:

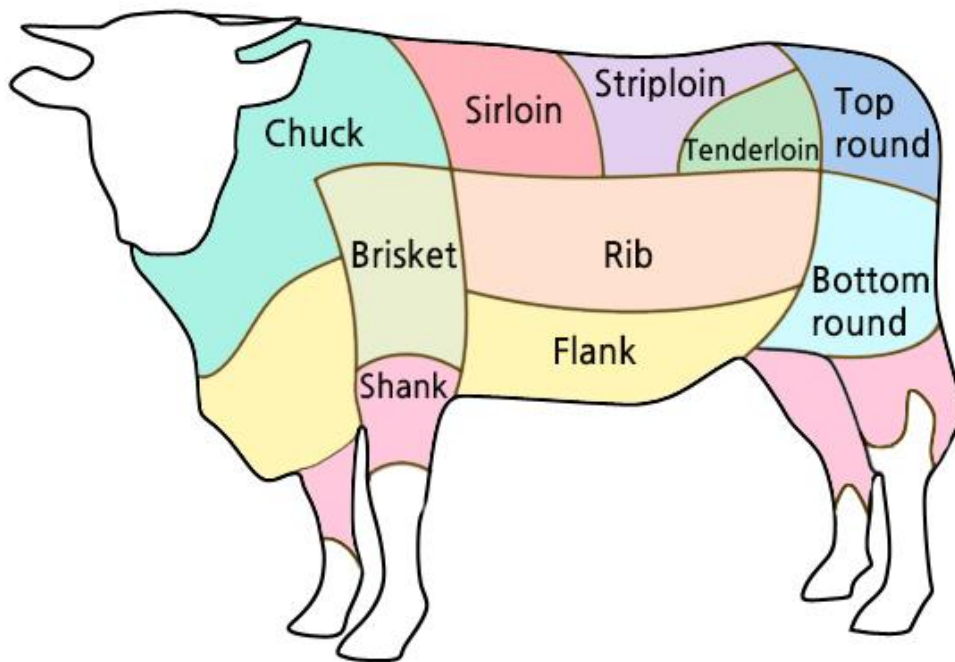

**Figure S1.** Location of 10 carcass primal cut yields in Hanwoo cattle.

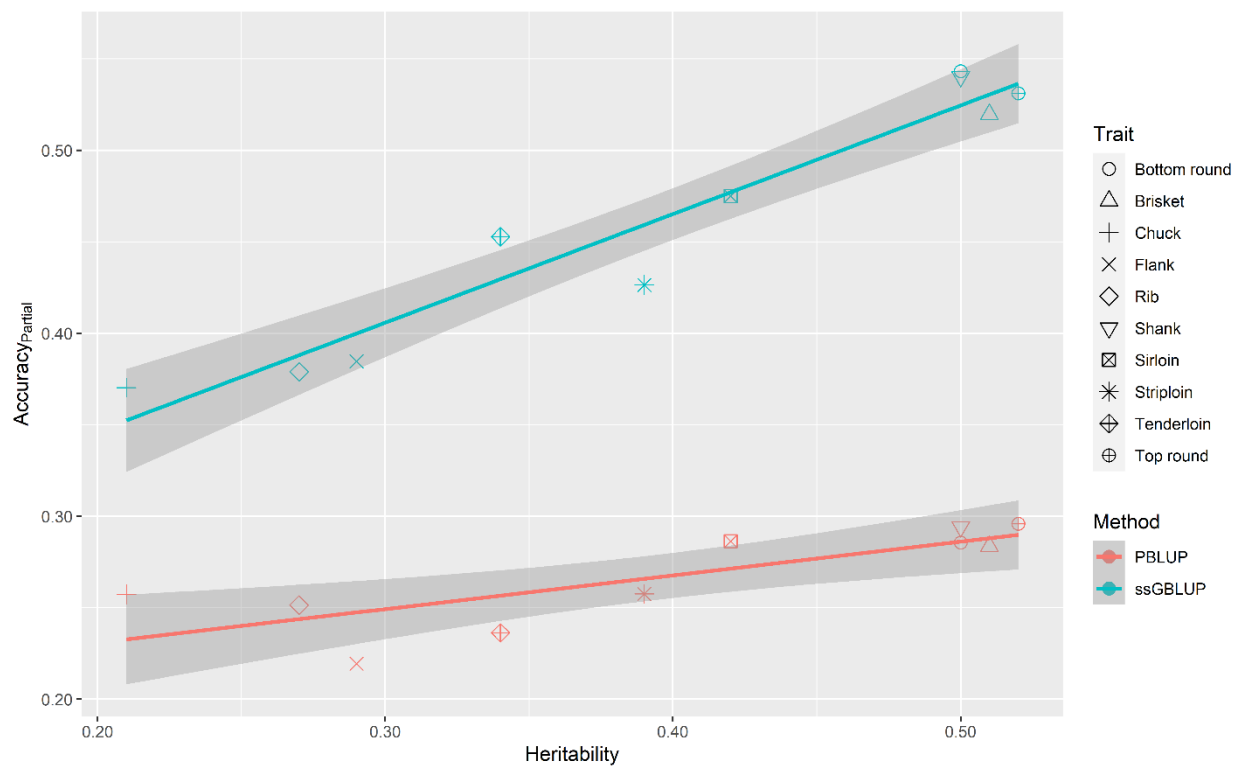

**Figure S2.** The regression coefficients of accuracy on the heritabilities of traits in the partial dataset.

The grey zone is the 95% confidence interval.
